# Supplementary material for: COPS: Detecting Co-Occurrence and Spatial Arrangement of Transcription Factor Binding Motifs in Genome-Wide Datasets
Source: PLoS One. 2012 Dec 18;7(12):e52055. doi: 10.1371/journal.pone.0052055 (PMC3525548; doi:10.1371/journal.pone.0052055)
Supplement: Table S2 — Analysis of genomic regions bound by neuroblast differentiation TFs in stage 10 to 11 Drosophila embryos. The table includes all the results generated by analyzing Pros-, Ase, Dpn- and Snail-bound genomic regions using COPS. The TF motif pairs found to co-occur are listed in column A. Known co-regulators are shown in bold. Candidate co-regulatory TFs expressed in neuroblasts/nervous system are highlighted in light blue. Column B shows the statistical significance of the co-occurrence pattern (Z score) and column C the percentage of motif overlap as calculated by the program. The tissue-specific expression of the co-occurring TF of each pair as reported in FlyBase is shown in column D and the literature supporting a co-regulatory role with the main TF in column E. Columns G-O show the preferred distance arrangements between the TF motifs of the different pairs and their statistical significance. (XLS) [file pone.0052055.s003.xls]

## Sheet: Prospero Dataset
TF pair	Z score	Motif Overlap (%)	Expression of the candidate co-regulator in the Drosophila embryo or larvae/adults (FlyBase)	Literature supporting a co-regulatory function with Pros		TF pair	Preferred Distance Arrangement (bp)	p-value	Preferred Distance Arrangement (bp)	p-value	Preferred Distance Arrangement (bp)	p-value
Ase / Pros	5.67688	0.0284091		Known Pros co-regulator (Southall et al. 2009)		Ase / Pros	-1~9	0.035985
Eip74EF / Pros	4.89846	0	low expression in the embryonic stages of interest			Eip74EF / Pros	19~29	0.0152107
Pros / Snail motif 2	4.5213	0.0197368		Known Pros co-regulator (Southall et al. 2009)		Pros / Snail motif 2	None
Pros / Snail motif 1	4.48577	0.0197368		Known Pros co-regulator (Southall et al. 2009)		Pros / Snail motif 1	None
Dpn / Pros	4.44484	0		Known Pros co-regulator (Southall et al. 2009)		Dpn / Pros	19~29	0.02205	99~109	0.0419706
Pros / Ttk	4.09877	0	glial cell, ventral nerve cord primordium			Pros / Ttk	99~109	0.0445492	79~89	0.0298786
Mad / Pros	3.43134	0.0786026	ubiquitous			Mad / Pros	19~29	0.0350977
Brk / Pros	3.29964	0.0140845	wing disc, ventral nerve primordium			Brk / Pros	-1~9	0.0323301
Btd / Pros	3.23074	0.0614035	procephalic neurogenic region			Btd / Pros	None
Hkb / Pros	2.94141	0.230088	ectoderm, neuroblasts			Hkb / Pros	99~109	0.0327374	29~39	0.0353532
Deaf1 / Pros	2.69099	0	embryonic/larval nervous system			Deaf1 / Pros	89~99	0.00489294	79~89	0.0441105
Pros / Z	2.58726	0.0212766	ubiquitous			Pros / Z	49~59	0.0330159
Ct / Pros	2.37456	0	larval & adult nervous system, sensory organs			Ct / Pros	None
Med / Pros	2.31078	0.054902	mesoderm, ectoderm, embryonic nervous system (later stages)			Med / Pros	79~89	0.00405022
Opa / Pros	2.26974	0.0921053	visceral mesoderm			Opa / Pros	39~49	0.0051877
Pros / Usp	2.17615	0.0890052	ubiquitous expression			Pros / Usp	9~19	0.011014	29~39	0.00518113	39~49	0.0035352
H / Pros	2.15194	0.09375	embryonic/larval central nervous system			H / Pros	9~19	0.00181361
known co-regulators shown in bold
TFs expressed in the mesoderm/muscle

## Sheet: Snail Dataset
TF pair	Z score	Motif Overlap (%)		Literature supporting a co-regulatory function with Snail		TF pair	Preferred Distance Arrangement (bp)	p-value	Preferred Distance Arrangement (bp)	p-value	Preferred Distance Arrangement (bp)	p-value
Dpn / Snail	10.4226	0		Known co-regulator (Southall et al. 2009)		Dpn / Snail	29~39	0.00324108	79~89	0.000598283
Brk / Snail	10.2374	0.0449438				Brk / Snail	29~39	0.00956997
Ase / Snail	10.2006	0.481723		Known co-regulator (Southall et al. 2009)		Ase / Snail	29~39	0.00220725
Mad / Snail	10.1416	0.0234375				Mad / Snail	9~19	0.0105972	19~29	0.036548	-1~9	7.95754e-05
H / Snail	9.68903	0.394495				H / Snail	29~39	0.000304677
Eip74EF / Snail	8.8674	0.00529101				Eip74EF / Snail	9~19	5.1119e-07	19~29	0.00411731
Btd / Snail	7.99122	0.0381679				Btd / Snail	49~59	0.00732003	19~29	0.000481498
Hkb / Snail	7.83081	0.00938967				Hkb / Snail	29~39	0.00109922
Med / Snail	7.69202	0.0596026				Med / Snail	9~19	0.00330931	39~49	0.0234654
Snail motif 1 / Snail motif 2	7.62496	0.538292				Snail motif 1 / Snail motif 2	69~79	0.00877928	29~39	0.00146956
Opa / Snail	7.12381	0.152672				Opa / Snail	19~29	5.43131e-05
Odd / Snail	6.47879	0.0860656				Odd / Snail	9~19	0.000528802
Snail / Usp	6.42214	0.0441176				Snail / Usp	19~29	0.00144084
Gcm / Snail	5.84095	0.0367347				Gcm / Snail	-1~9	0.00247077	39~49	0.0304648
Deaf1 / Snail	5.71727	0				Deaf1 / Snail	99~109	0.0212611	29~39	0.0195253	39~49	0.023042
Snail / Vis	5.07132	0				Snail / Vis	19~29	0.0232992	99~109	0.00188893	-1~9	0.0128065
Snail / Twi	4.90059	0.624665		Known co-regulator (Zeitlinger et al. 2007)		Snail / Twi	9~19	0.018405
Bap / Snail	4.82945	0.383929				Bap / Snail	49~59	0.0361395	19~29	0.013237	-1~9	0.0386103
Byn / Snail	4.78236	0.208955				Byn / Snail	59~69	0.000734523
Snail / Tin	4.26206	0.569364				Snail / Tin	99~109	0.0366308
Su(H) / Snail	4.22397	0.133333				Su(H) / Snail	9~19	0.030186	49~59	0.00198694
Dorsal motif 2 / Snail	4.08174	0		Known co-regulator (Zeitlinger et al. 2007)		Dorsal motif 2 / Snail	9~19	0.0363889
Kr / Snail	3.69309	0.0285714				Kr / Snail	None
Trl / Snail	3.62856	0.0842697				Trl / Snail	9~19	0.0390174
Snail / Ttk	3.46425	0.0633803				Snail / Ttk	59~69	0.0490253	39~49	0.00791239
Hth / Snail	3.31614	0.108696				Hth / Snail	19~29	0.00196804	-1~9	0.00261948
Dorsal / Snail	3.28687	0		Known co-regulator (Zeitlinger et al. 2007)		Dorsal / Snail	59~69	0.0108456	-1~9	0.0318305	39~49	2.35679e-05
Dorsal motif 1 / Snail	3.09026	0.00546448		Known co-regulator (Zeitlinger et al. 2007)		Dorsal motif 1 / Snail	19~29	0.031054	39~49	0.000154753
Pros / Snail	3.0163	0.0285714		Known co-regulator (Southall et al. 2009)		Pros / Snail	99~109	0.0274616
Ovo / Snail	2.5857	0.0285714				Ovo / Snail	59~69	0.000956074	29~39	0.049754
Prd / Snail	2.5857	0.0285714				Prd / Snail	59~69	0.000956074	29~39	0.049754
Runt / Snail	2.43557	0				Runt / Snail	89~99	0.0179913	19~29	0.0072513
Sd / Snail	2.22092	0.0645161				Sd / Snail	29~39	0.0225043
known co-regulators shown in bold

## Sheet: Asense Dataset
TF pair	Z score	Motif Overlap (%)		Literature supporting a co-regulatory function with Ase		TF pair	Preferred Distance Arrangement (bp)	p-value	Preferred Distance Arrangement (bp)	p-value	Preferred Distance Arrangement (bp)	p-value
Ase / Dpn	12.2163	0.028777		Known co-regulator (Southall et al. 2009)		Ase / Dpn	9~19	0.020103	-1~9	0.0150949
Mad / Ase	9.38571	0.25731				Mad / Ase	9~19	0.000136172	89~99	0.0089377
Ase / Brk	9.21974	0.12854				Ase / Brk	9~19	1.67713e-05	-1~9	0.00174485
Ase / Snail motif 1	7.99501	0.470752		Known co-regulator (Southall et al. 2009)		Ase / Snail motif 1	99~109	0.0106924
Ase / Snail motif 2	7.98018	0.472222		Known co-regulator (Southall et al. 2009)		Ase / Snail motif 2	99~109	0.0106978
Eip74EF / Ase	7.68248	0.0163265				Eip74EF / Ase	9~19	0.0108576
Ase / H	7.2574	0.312268				Ase / H	9~19	0.00021439	89~99	0.0294557
Ase / Opa	7.18676	0.422101				Ase / Opa	None
Med / Ase	6.79422	0.291925				Med / Ase	9~19	0.0181781	-1~9	0.0143417
Ase / Odd	6.66815	0.200549				Ase / Odd	19~29	0.0392395	99~109	0.000961823
Ase / Btd	6.53845	0.178922				Ase / Btd	79~89	0.0402742
Ase / Hkb	6.0373	0.0900322				Ase / Hkb	19~29	0.00240774	29~39	0.0348107
Ase / Twi	6.02473	0.780847				Ase / Twi	-1~9	0.0119622
Deaf1 / Ase	5.73129	0.0248963				Deaf1 / Ase	9~19	0.00778985	-1~9	0.00332598
Ase / Gcm	5.6688	0.0716332				Ase / Gcm	-1~9	0.000319032
Trl / Ase	5.4133	0.0301724				Trl / Ase	49~59	0.0345021	69~79	0.0226832	29~39	0.00445021
Su(H) / Ase	4.48794	0.131034				Su(H) / Ase	-1~9	0.00667755
Ase / Usp	4.37772	0.0777778				Ase / Usp	19~29	0.00515799	69~79	0.00360724
Ase / Byn	3.91595	0.140741				Ase / Byn	59~69	0.0275863	29~39	0.045154
Ase / Prd	3.54823	0.0689655				Ase / Prd	19~29	0.0111308	-1~9	0.00310951
Ase / Ovo	3.54823	0.0689655				Ase / Ovo	19~29	0.0111308	-1~9	0.00310951
Ase / Tin	3.42848	0.0562914				Ase / Tin	-1~9	0.00142305
Ase / Bap	3.31442	0.119266				Ase / Bap	59~69	0.0285537	19~29	0.0060515
Ase / Ttk	3.30852	0.0189873				Ase / Ttk	19~29	0.0499757	39~49	0.00305436
Ase / Z	3.28357	0				Ase / Z	None
Ase / Kni	2.84071	0.0693878				Ase / Kni	None
Ase / Grh	2.69401	0.0528302				Ase / Grh	49~59	0.000126982	29~39	0.0120838
Ase / Runt	2.42408	0.0384615				Ase / Runt	-1~9	8.86599e-06
Ase / Pros	2.13095	0.016129		Known co-regulator (Southall et al. 2009)		Ase / Pros	None
known co-regulators shown in bold

## Sheet: Deadpan Dataset
TF pair	Z score	Motif Overlap (%)		Literature supporting a co-regulatory function with Dpn		TF pair	Preferred Distance Arrangement (bp)	p-value	Preferred Distance Arrangement (bp)	p-value	Preferred Distance Arrangement (bp)	p-value	Preferred Distance Arrangement (bp)	p-value
Mad / Dpn	7.47801	0.122881				Mad / Dpn	39~49	0.00150273
Ase / Dpn	7.324	0.0352941		Known co-regulator (Southall et al. 2009)		Ase / Dpn	89~99	0.00150904	-1~9	0.0457494	39~49	0.00252507
Dpn / H	7.17714	0.788462				Dpn / H	89~99	0.0160808
Brk / Dpn	7.06321	0.151639				Brk / Dpn	29~39	0.0204534	79~89	0.0382987
Eip74EF / Dpn	6.95367	0.00680272				Eip74EF / Dpn	19~29	0.0257364	49~59	0.0383075	99~109	0.000441731	-1~9	0.0266039
Deaf1 / Dpn	6.55405	0				Deaf1 / Dpn	89~99	0.0460643
Med / Dpn	5.78246	0.162162				Med / Dpn	9~19	0.0367194	39~49	0.0310315
Dpn / Usp	4.75622	0.0890052				Dpn / Usp	None
Dpn / Ttk	4.63247	0				Dpn / Ttk	9~19	0.00878381
Dpn / Hkb	4.5085	0.28169				Dpn / Hkb	29~39	0.0117376	39~49	0.0489266
Dpn / Opa	4.40941	0.253219				Dpn / Opa	49~59	0.0387262	39~49	0.0153269
Btd / Dpn	4.21893	0.116379				Btd / Dpn	49~59	0.0373318	99~109	0.0492738	39~49	0.00340876
Dpn / Odd	3.76915	0.0584795				Dpn / Odd	39~49	0.00160543
Dpn / Snail motif 1	3.41569	0		Known co-regulator (Southall et al. 2009)		Dpn / Snail motif 1	89~99	0.0146328	39~49	0.00245665
Dpn / Snail motif 2	3.41569	0		Known co-regulator (Southall et al. 2009)		Dpn / Snail motif 2	89~99	0.0134488	39~49	0.00378896
Dpn / Gcm	2.65478	0.134715				Dpn / Gcm	19~29	0.000118199
Su(H) / Dpn	2.62286	0.173469				Su(H) / Dpn	39~49	0.0284447
Dpn / Twi	2.6173	0.49434				Dpn / Twi	None
Dpn / Z	2.45918	0.0362319				Dpn / Z	49~59	0.00655884	59~69	0.0453799
Dorsal motif 2 / Dpn	2.45661	0.0340136				Dorsal motif 2 / Dpn	89~99	0.00246722
Trl / Dpn	2.44526	0.0402685				Trl / Dpn	59~69	0.0280153
Dpn / Grh	2.33327	0				Dpn / Grh	99~109	0.0418046	-1~9	0.00556966
Dpn / Tin	2.08219	0.1875				Dpn / Tin	29~39	0.0214218
Dpn / Hth	2.03155	0.0471698				Dpn / Hth	19~29	0.00156929
known co-regulators shown in bold
