# Supplementary material for: COPS: Detecting Co-Occurrence and Spatial Arrangement of Transcription Factor Binding Motifs in Genome-Wide Datasets
Source: PLoS One. 2012 Dec 18;7(12):e52055. doi: 10.1371/journal.pone.0052055 (PMC3525548; doi:10.1371/journal.pone.0052055)
Supplement: Table S4 — Overrepresented GO terms of genes associated to genomic regions showing close distance arrangements of TFBS pairs. The table shows the GO terms (biological process, Column B) that were found overrepresented among the genes associated with genomic regions containing the motif pairs Bin/Twi, Mad/Twi and Ase/Dpn (Column A of each worksheet) at a close distance arrangement of −1–9 bp. The P value for each overrepresented GO term is shown in Column G. The P value was calculated by comparing the number of genes linked to each GO term to the total number of genes associated with genomic regions containing the short distance motif pair (Column C vs Column D) in relation to the number of genes linked to the GO term and associated to regions without the short distance motif pair (Column E vs Column F). (XLS) [file pone.0052055.s005.xls]

## Sheet: Bin Twi -1-9 bp
TF pair	GO term (biological function)	Number of genes associated to non-coding regions containing Bin/Twi BS at -1-9 bp distance and showing the GO term	Total number of genes associated to non-coding regions containing Bin/Twi BS at -1-9 bp distance	Number of genes associated to non-coding regions without Bin/Twi BS at -1-9 bp distance and showing the GO term	Total number of genes associated to non-coding regions without Bin/Twi BS at -1-9 bp distance	p-value (statistical significance of GO term enrichment)
Bin / Twi (-1-9 bp distance)	GO:0007522_visceral_muscle_development	3	1941	4	13489	0.0471711
	GO:0009636_response_to_toxin	3	1941	3	13490	0.0296967
	GO:0006936_muscle_contraction	3	1941	4	13489	0.0471711
	GO:0003382_epithelial_cell_morphogenesis	3	1941	1	13492	0.00722517
	GO:0051383_kinetochore_organization	3	1941	2	13491	0.016371
	GO:0007380_specification_of_segmental_identity,_head	3	1941	4	13489	0.0471711
	GO:0048728_proboscis_development	3	1941	3	13490	0.0296967
	GO:0006879_cellular_iron_ion_homeostasis	3	1941	4	13489	0.0471711
	GO:0015746_citrate_transport	3	1941	4	13489	0.0471711
	GO:0009649_entrainment_of_circadian_clock	4	1940	7	13486	0.0398607
	GO:0007523_larval_visceral_muscle_development	4	1940	1	13492	0.00112798
	GO:0006665_sphingolipid_metabolic_process	4	1940	5	13488	0.0187013
	GO:0043277_apoptotic_cell_clearance	4	1940	2	13491	0.00304521
	GO:0030182_neuron_differentiation	4	1940	5	13488	0.0187013
	GO:0051607_defense_response_to_virus	4	1940	7	13486	0.0398607
	GO:0031935_regulation_of_chromatin_silencing	4	1940	7	13486	0.0398607
	GO:0035282_segmentation	5	1939	8	13485	0.0169397
	GO:0035225_determination_of_genital_disc_primordium	5	1939	5	13488	0.00458825
	GO:0007525_somatic_muscle_development	6	1938	10	13483	0.0103014
	GO:0006379_mRNA_cleavage	6	1938	8	13485	0.00482475
	GO:0007350_blastoderm_segmentation	6	1938	16	13477	0.049705
	GO:0045214_sarcomere_organization	6	1938	14	13479	0.032104
	GO:0006520_cellular_amino_acid_metabolic_process	6	1938	13	13480	0.0250732
	GO:0007275_multicellular_organismal_development	8	1936	23	13470	0.0343148
	GO:0009987_cellular_process	12	1932	45	13448	0.0489719
	GO:0005975_carbohydrate_metabolic_process	14	1930	45	13448	0.013163
	GO:0006333_chromatin_assembly_or_disassembly	22	1922	98	13395	0.043972
	GO:0006911_phagocytosis,_engulfment	34	1910	156	13337	0.0211992

## Sheet: Mad Twi -1-9 bp
TF pair	GO term (biological function)	Number of genes associated to non-coding regions containing Mad/Twi BS at -1-9 bp distance and showing the GO term	Total number of genes associated to non-coding regions containing Mad/Twi BS at -1-9 bp distance	Number of genes associated to non-coding regions without Mad/Twi BS at -1-9 bp distance and showing the GO term	Total number of genes associated to non-coding regions without Mad/Twi BS at -1-9 bp distance	p-value (statistical significance of GO term enrichment)
Mad / Twi (-1-9 bp distance)	GO:0007365_periodic_partitioning	3	2582	2	12850	0.0359265
	GO:0007212_dopamine_receptor_signaling_pathway	3	2582	1	12851	0.01641
	GO:0035263_genital_disc_sexually_dimorphic_development	3	2582	2	12850	0.0359265
	GO:0016457_dosage_compensation_complex_assembly_involved_in_dosage_compensation_by_hyperactivation_of_X_chromosome	3	2582	2	12850	0.0359265
	GO:0006420_arginyl-tRNA_aminoacylation	3	2582	1	12851	0.01641
	GO:0016050_vesicle_organization	3	2582	1	12851	0.01641
	GO:0051605_protein_maturation_by_peptide_bond_cleavage	3	2582	1	12851	0.01641
	GO:0035435_phosphate_transmembrane_transport	3	2582	1	12851	0.01641
	GO:0007429_secondary_branching,_open_tracheal_system	3	2582	1	12851	0.01641
	GO:0003136_negative_regulation_of_heart_induction_by_canonical_Wnt_receptor_signaling_pathway	3	2582	1	12851	0.01641
	GO:0006611_protein_export_from_nucleus	3	2582	2	12850	0.0359265
	GO:0051491_positive_regulation_of_filopodium_assembly	4	2581	2	12850	0.00884128
	GO:0010002_cardioblast_differentiation	4	2581	4	12848	0.0311143
	GO:0007366_periodic_partitioning_by_pair_rule_gene	4	2581	4	12848	0.0311143
	GO:0007378_amnioserosa_formation	4	2581	2	12850	0.00884128
	GO:0035193_larval_central_nervous_system_remodeling	4	2581	3	12849	0.0179054
	GO:0032880_regulation_of_protein_localization	4	2581	2	12850	0.00884128
	GO:0045861_negative_regulation_of_proteolysis	4	2581	5	12847	0.0487131
	GO:0007485_imaginal_disc-derived_male_genitalia_development	4	2581	4	12848	0.0311143
	GO:0030589_pseudocleavage_involved_in_syncytial_blastoderm_formation	4	2581	5	12847	0.0487131
	GO:0007450_dorsal/ventral_pattern_formation,_imaginal_disc	4	2581	5	12847	0.0487131
	GO:0045947_negative_regulation_of_translational_initiation	4	2581	2	12850	0.00884128
	GO:0048747_muscle_fiber_development	4	2581	4	12848	0.0311143
	GO:0007448_anterior/posterior_pattern_formation,_imaginal_disc	4	2581	4	12848	0.0311143
	GO:0006890_retrograde_vesicle-mediated_transport,_Golgi_to_ER	4	2581	4	12848	0.0311143
	GO:0051642_centrosome_localization	4	2581	3	12849	0.0179054
	GO:0007098_centrosome_cycle	4	2581	5	12847	0.0487131
	GO:0040001_establishment_of_mitotic_spindle_localization	4	2581	5	12847	0.0487131
	GO:0007513_pericardial_cell_differentiation	5	2580	4	12848	0.00911573
	GO:0035225_determination_of_genital_disc_primordium	5	2580	5	12847	0.0157401
	GO:0010212_response_to_ionizing_radiation	5	2580	3	12849	0.0046965
	GO:0016348_imaginal_disc-derived_leg_joint_morphogenesis	5	2580	4	12848	0.00911573
	GO:0008630_DNA_damage_response,_signal_transduction_resulting_in_induction_of_apoptosis	5	2580	4	12848	0.00911573
	GO:0007306_eggshell_chorion_assembly	6	2579	8	12844	0.019456
	GO:0008594_photoreceptor_cell_morphogenesis	6	2579	8	12844	0.019456
	GO:0035215_genital_disc_development	6	2579	7	12845	0.0129199
	GO:0051017_actin_filament_bundle_assembly	7	2578	10	12842	0.0150121
	GO:0035017_cuticle_pattern_formation	7	2578	8	12844	0.00675528
	GO:0006917_induction_of_apoptosis	7	2578	13	12839	0.0378982
	GO:0007400_neuroblast_fate_determination	8	2577	17	12835	0.0457025
	GO:0007455_eye-antennal_disc_morphogenesis	8	2577	17	12835	0.0457025
	GO:0006396_RNA_processing	8	2577	15	12837	0.0281735
	GO:0008298_intracellular_mRNA_localization	9	2576	16	12836	0.0161013
	GO:0007156_homophilic_cell_adhesion	9	2576	20	12832	0.0422684
	GO:0006626_protein_targeting_to_mitochondrion	10	2575	16	12836	0.00675219
	GO:0030162_regulation_of_proteolysis	10	2575	17	12835	0.00914226
	GO:0007059_chromosome_segregation	10	2575	22	12830	0.0316666
	GO:0045451_pole_plasm_oskar_mRNA_localization	10	2575	21	12831	0.0254861
	GO:0007275_multicellular_organismal_development	11	2574	20	12832	0.00916019
	GO:0048190_wing_disc_dorsal/ventral_pattern_formation	13	2572	35	12817	0.0481246
	GO:0030036_actin_cytoskeleton_organization	14	2571	32	12820	0.0154798
	GO:0007507_heart_development	15	2570	39	12813	0.0285966
	GO:0007476_imaginal_disc-derived_wing_morphogenesis	29	2556	88	12764	0.0166743
	GO:0007155_cell_adhesion	29	2556	89	12763	0.018669
	GO:0007186_G-protein_coupled_receptor_protein_signaling_pathway	31	2554	95	12757	0.0151855
	GO:0046331_lateral_inhibition	50	2535	158	12694	0.00422836

## Sheet: Ase Dpn -1-9 bp
TF pair	GO term (biological function)	Number of genes associated to non-coding regions containing Ase/Dpn BS at -1-9 bp distance and showing the GO term	Total number of genes associated to non-coding regions containing Ase/Dpn BS at -1-9 bp distance	Number of genes associated to non-coding regions without Ase/Dpn BS at -1-9 bp distance and showing the GO term	Total number of genes associated to non-coding regions without Ase/Dpn BS at -1-9 bp distance	p-value (statistical significance of GO term enrichment)
Ase / Dpni (-1-9 bp distance)	GO:0008062_eclosion_rhythm	3	719	7	14708	0.00955115
	GO:0007080_mitotic_metaphase_plate_congression	3	719	9	14706	0.0163297
	GO:0051299_centrosome_separation	3	719	7	14708	0.00955115
	GO:0007449_proximal/distal_pattern_formation,_imaginal_disc	2	720	1	14714	0.00635003
	GO:0006378_mRNA_polyadenylation	4	718	13	14702	0.00693411
	GO:0006379_mRNA_cleavage	3	719	11	14704	0.0252056
	GO:0007623_circadian_rhythm	7	715	24	14691	0.000467205
	GO:0007622_rhythmic_behavior	3	719	10	14705	0.0205032
	GO:2000274_regulation_of_epithelial_cell_migration,_open_tracheal_system	2	720	4	14711	0.0289013
	GO:0032956_regulation_of_actin_cytoskeleton_organization	2	720	5	14710	0.0392237
	GO:0048812_neuron_projection_morphogenesis	2	720	4	14711	0.0289013
	GO:0048814_regulation_of_dendrite_morphogenesis	3	719	10	14705	0.0205032
	GO:0048148_behavioral_response_to_cocaine	3	719	6	14709	0.00692423
	GO:0030261_chromosome_condensation	3	719	15	14700	0.0492323
	GO:0030706_germarium-derived_oocyte_differentiation	2	720	1	14714	0.00635003
	GO:0051017_actin_filament_bundle_assembly	3	719	14	14701	0.0424587
	GO:0008355_olfactory_learning	8	714	42	14673	0.00206978
	GO:0000278_mitotic_cell_cycle	6	716	24	14691	0.00232325
	GO:0000090_mitotic_anaphase	3	719	11	14704	0.0252056
	GO:0006412_translation	43	679	462	14253	0.000109626
	GO:0007616_long-term_memory	6	716	33	14682	0.00894365
	GO:0007611_learning_or_memory	5	717	36	14679	0.0411889
	GO:0008615_pyridoxine_biosynthetic_process	2	720	2	14713	0.0123067
	GO:0031000_response_to_caffeine	2	720	2	14713	0.0123067
	GO:0035017_cuticle_pattern_formation	3	719	12	14703	0.030436
	GO:0042049_cellular_acyl-CoA_homeostasis	2	720	5	14710	0.0392237
	GO:0007030_Golgi_organization	5	717	37	14678	0.0450278
	GO:0045750_positive_regulation_of_S_phase_of_mitotic_cell_cycle	2	720	5	14710	0.0392237
	GO:0048512_circadian_behavior	3	719	3	14712	0.00183234
	GO:0045187_regulation_of_circadian_sleep/wake_cycle,_sleep	3	719	8	14707	0.0126818
	GO:0016055_Wnt_receptor_signaling_pathway	6	716	50	14665	0.0458976
	GO:0030203_glycosaminoglycan_metabolic_process	2	720	1	14714	0.00635003
	GO:0007620_copulation	2	720	5	14710	0.0392237
	GO:0001578_microtubule_bundle_formation	2	720	4	14711	0.0289013
	GO:0006644_phospholipid_metabolic_process	3	719	8	14707	0.0126818
	GO:0007140_male_meiosis	4	718	24	14691	0.0398126
	GO:0048728_proboscis_development	2	720	4	14711	0.0289013
	GO:0006911_phagocytosis,_engulfment	16	706	174	14541	0.0167496
	GO:0051647_nucleus_localization	2	720	1	14714	0.00635003
	GO:0006614_SRP-dependent_cotranslational_protein_targeting_to_membrane	3	719	8	14707	0.0126818
	GO:0007346_regulation_of_mitotic_cell_cycle	4	718	22	14693	0.0312675
	GO:0016042_lipid_catabolic_process	3	719	11	14704	0.0252056
	GO:0007418_ventral_midline_development	2	720	4	14711	0.0289013
	GO:0008344_adult_locomotory_behavior	4	718	16	14699	0.0126314
	GO:0006997_nucleus_organization	2	720	3	14712	0.0198783
	GO:0045944_positive_regulation_of_transcription_from_RNA_polymerase_II_promoter	6	716	48	14667	0.0394398
	GO:0006400_tRNA_modification	2	720	5	14710	0.0392237
